# Supplementary material
Source: PubMed Central journal article supplement (PMC6759737)

## **Supplemental Material and Methods**

### **Antibodies and reagents**

The following rat anti-mouse monoclonal antibodies (MoAbs) directly conjugated with fluorophore purchased from eBioscience (San Diego, CA) were used in our studies for flow cytometry analysis: CD45.1, CD45.2, CD4, CD8, B220, CD25, and Foxp3. Anti-mouse CD41 MoAb directly conjugated with phycoerythrin was purchased from Santa Cruz Biotech (Santa Cruz, CA). Mouse BD Fc Block was purchased from BD Pharmingen (Franklin Lakes, NJ). Biotinylated anti-CD45.2, CD117, CD4, and CD8 were purchased from BioLegend (San Diego, CA). Streptavidin-SAP was purchased from Advanced Targeting Systems (San Diego, CA). The EasySep™ Mouse SCA1 Positive Selection Kit was purchased from StemCell Technologies Inc. (Cambridge, MA). The QIAamp DNA Blood Mini Kit was purchased from QIAGEN (Germantown, MD). GoTaq® Green Master Mix was purchased from Promega (Madison, WI). Coatest VIII:C/4 Kit was purchased from Diapharma (Franklin, OH). Recombinant human B-domain deleted FVIII (rhF8, Xyntha) was purchased from Pfizer (New York, NY).

### **Peripheral blood analysis**

Blood samples were collected as previously described<sup>1;2</sup> for blood counts and chimerism analysis. Whole blood counts were performed using the Scil Vet ABC Plus blood counter (Scil Animal Care Company, Gurnee, IL). Leukocytes were isolated and stained for cell markers CD45.1, CD45.2, CD4, CD8, B220, CD25, Foxp3 and analyzed by flow cytometry as described in our previous report.<sup>3</sup> Myeloid cells were calculated using 100% of leukocytes minus the percentage of CD4, CD8, and B cells. Platelets were stained for cell marker CD41 as described in our previous report.<sup>4;5</sup> Peripheral blood cell chimerism was determined by flow cytometry

analysis of cell surface markers CD45.1 and CD45.2 in a setting in which the congenic markers can be used to track donor- and recipient-derived cells. For transplants using GFP<sup>Tg</sup>/CD45.2 donor cells, chimerism was determined using the GFP<sup>+</sup> marker within the CD45<sup>+</sup> gate for leukocytes or the GPIIb<sup>+</sup> gate for platelets.

### **PCR and quantitative real-time PCR (qPCR)**

DNA was purified from peripheral leukocytes using the QIAamp DNA Blood Mini Kit. A 153-bp fragment from the 2bF8 cassette was amplified as described in our previous report<sup>2</sup> using primers 5'-ATCGCTAAGCCAAGGCCACCCT-3' and 5'-GCTCCCTCAGAAGCTTTCCAGTAGGA-3'. To confirm the FVIII<sup>null</sup> background, primers (5'-GAGAACCTGCGTGCAATCCATCTT-3' and 5'-GAGCAAATTCCTGTACTGAC-3') amplifying a 350-bp fragment of the disrupted exon 17 of murine FVIII were used. Another set of primers, 5'-GCAAGGGAAGTGATATCACT-3' and 5'-TCCTGTACTGACACTTGTCTC-3', was used to amplify a 233-bp fragment from the undisrupted wild-type (WT) FVIII gene as a control to confirm the exon 17 disruption. DNA from a known 2bF8 transgenic mouse<sup>6</sup> served as a 2bF8-positive control, and water was used as a negative control.

The average copy number of 2bF8 proviral DNA per cell in recipients was determined by quantitative real-time PCR (qPCR) as described in our previous report.<sup>2</sup> Briefly, leukocyte-derived genomic DNA was analyzed for quantification of the 2bF8 expression cassette sequence, with normalization to the murine *Apo B* gene with IDT PrimeTime Gene Expression Master Mix (Integrated DNA Technologies, Inc. Coralville, IA). Triplicates were performed for all real-time PCR reactions using the Applied Biosystems QuantStudio 6 Flex Real-Time PCR system

(Thermo Fisher Scientific, Waltham, MA). DNAs from 2bF8<sup>Tg,2;6</sup> FVIII<sup>null</sup> and WT mice was used as controls.

### **Phenotypic correction assessment**

A tail bleeding test and a joint injury model were used to assess the bleeding phenotype in recipients at least 4 months after 2bF8LV gene therapy. We used a 6-hour tail bleeding test to grade the phenotypic correction in 2bF8LV-transduced recipients as described in our previous reports.<sup>5;7-9</sup> For the joint injury model, we used a needle-induced knee joint injury as previously described.<sup>10-13</sup> Briefly, hair was removed from the hind limbs and joint injury was induced (right knee) by transcutaneous insertion of a G30 needle through the patellar ligament using aseptic technique. The uninjured left knee served as an intra-animal control. Knee joints were evaluated by visual assessment of bleeding /bruising. The external diameter across the joint from lateral to medial was measured before and 24 hours after the injury using a digital caliper micrometer. Three replicate measurements of each joint were recorded, and data were averaged. Buprenorphine was administered for post-procedural pain relief. The measurement of baseline diameter of each joint was defined as 1. FVIII<sup>null</sup> and WT mice were tested in parallel as controls.

### **FVIII immune responses study**

Plasmas were collected from animals and the titers of anti-FVIII inhibitory antibodies (inhibitors) at different time points after gene therapy were determined by a modified Bethesda assay as previously described.<sup>1</sup> After at least 24 weeks of gene therapy, animals were challenged with rhF8 at a dose of either 100 U/kg or 200 U/kg weekly for 4 weeks by intravenous

administration and plasmas were collected one week after the last immunization for Bethesda assay to determine inhibitor titers. FVIII<sup>null</sup> mice were used as a control in parallel.

### Statistical analysis

Data are presented as the mean  $\pm$  SD. Statistical comparisons of two experimental groups were evaluated by two-tail Student's *t* test or the Mann-Whitney test depending on whether data distribution passes the Normality test. The Fisher Exact test was used to compare the percentage of animals whose tail bleeding stopped within 6 hours after tail tip transection and the incidence of anti-FVIII inhibitor development and. The ANOVA followed by the Dunnett's multiple comparisons test was used to determine whether there were statistically significant differences between the means of three or more groups. The two-way ANOVA followed by the Tukey's multiple comparisons test was used for comparison between groups at different time points throughout the studies. Statistical analysis was performed using Software SigmaPlot 14.0 (Systat Software, Inc. San Jose, CA) and GraphPad Prism 7 (GraphPad Software, La Jolla, CA). A value of  $P < 0.05$  was considered statistically significant.

### Reference List

- (1) Shi Q, Wilcox DA, Fahs SA et al. Factor VIII ectopically targeted to platelets is therapeutic in hemophilia A with high-titer inhibitory antibodies. *J Clin Invest* 2006;116:1974-1982.
- (2) Shi Q, Fahs SA, Wilcox DA et al. Syngeneic transplantation of hematopoietic stem cells that are genetically modified to express factor VIII in platelets restores hemostasis to hemophilia A mice with preexisting FVIII immunity. *Blood* 2008;112:2713-2721.
- (3) Luo X, Chen J, Schroeder JA et al. Platelet Gene Therapy Promotes Targeted Peripheral Tolerance by Clonal Deletion and Induction of Antigen-Specific Regulatory T Cells. *Front Immunol* 2018;9:1950.

- (4) Kanaji S, Kuether EL, Fahs SA et al. Correction of Murine Bernard-Soulier Syndrome by Lentivirus-mediated Gene Therapy. *Mol Ther* 2012;20:625-632.
- (5) Chen J, Schroeder JA, Luo X, Montgomery RR, Shi Q. The impact of GPIIb/IIIa on platelet-targeted FVIII gene therapy in hemophilia A mice with pre-existing anti-FVIII immunity. *J Thromb Haemost* 2019;17:449-459.
- (6) Baumgartner CK, Mattson JG, Weiler H, Shi Q, Montgomery RR. Targeting factor VIII expression to platelets for hemophilia A gene therapy does not induce an apparent thrombotic risk in mice. *J Thromb Haemost* 2017;15:98-109.
- (7) Chen Y, Schroeder JA, Kuether EL, Zhang G, Shi Q. Platelet gene therapy by lentiviral gene delivery to hematopoietic stem cells restores hemostasis and induces humoral immune tolerance in FIX(null) mice. *Mol Ther* 2014;22:169-177.
- (8) Schroeder JA, Chen Y, Fang J, Wilcox DA, Shi Q. In vivo enrichment of genetically manipulated platelets corrects the murine hemophilic phenotype and induces immune tolerance even using a low multiplicity of infection. *J Thromb Haemost* 2014;12:1283-1293.
- (9) Chen Y, Luo X, Schroeder JA et al. Immune tolerance induced by platelet-targeted factor VIII gene therapy in hemophilia A mice is CD4 T cell mediated. *J Thromb Haemost* 2017;15:1994-2004.
- (10) Kiouptsi K, Grill A, Mann A et al. Mice deficient in the anti-haemophilic coagulation factor VIII show increased von Willebrand factor plasma levels. *PLoS One* 2017;12:e0183590.
- (11) Sun J, Hua B, Livingston EW et al. Abnormal joint and bone wound healing in hemophilia mice is improved by extending factor IX activity after hemarthrosis. *Blood* 2017;129:2161-2171.
- (12) Hakobyan N, Enockson C, Cole AA, Sumner DR, Valentino LA. Experimental haemophilic arthropathy in a mouse model of a massive haemarthrosis: gross, radiological and histological changes. *Haemophilia* 2008;14:804-809.
- (13) Sun J, Hakobyan N, Valentino LA, Feldman BL, Samulski RJ, Monahan PE. Intraarticular factor IX protein or gene replacement protects against development of hemophilic synovitis in the absence of circulating factor IX. *Blood* 2008;112:4532-4541.

## Supplemental Figure Legend

**Supplemental Figure 1. Flow cytometry analysis of chimerism in each subset of cells in 2bF8LV-transduced recipients under (CD45.2+CD117)-ADC preconditioning.** Blood samples were collected from recipients monthly. Leukocytes were isolated and stained with CD45.1, CD45.2, CD4, CD8, and B220 antibodies and analyzed by flow cytometry. (A)

Percentage of donor-derived cells in each subset. **(B)** Percentage of recipient-derived cells in each subset.

**Supplemental Figure 2. Chimerism in 2bF8LV-transduced recipients under various preconditioning regimens.** Blood samples were collected at 11 weeks after transplantation. Leukocytes were isolated and stained for CD45.1 (donor-derived cell marker), CD45.2 (recipient-derived cell marker), CD4, CD8, and B220. **(A)** Representative dot plots from flow cytometry analysis. **(B)** Summarized data from each group of animals. Data are presented as mean  $\pm$  SD. The statistical differences between the groups were analyzed using the two-way ANOVA followed by the Tukey's multiple comparisons test. \*  $P < .05$ ; \*\* $P < .01$ ; \*\*\* $P < .001$ ; and \*\*\*\* $P < .0001$ .

# Supplemental Figure 1

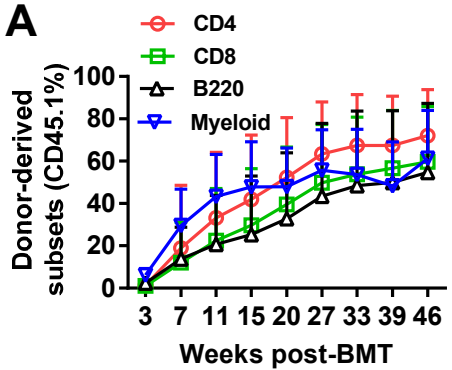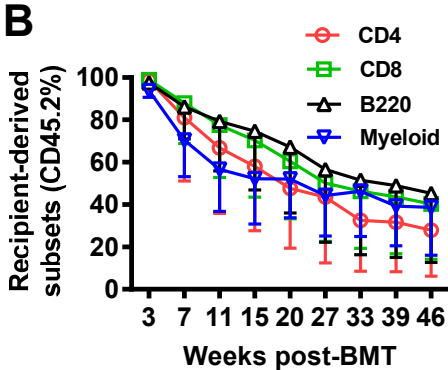

# Supplemental Figure 2

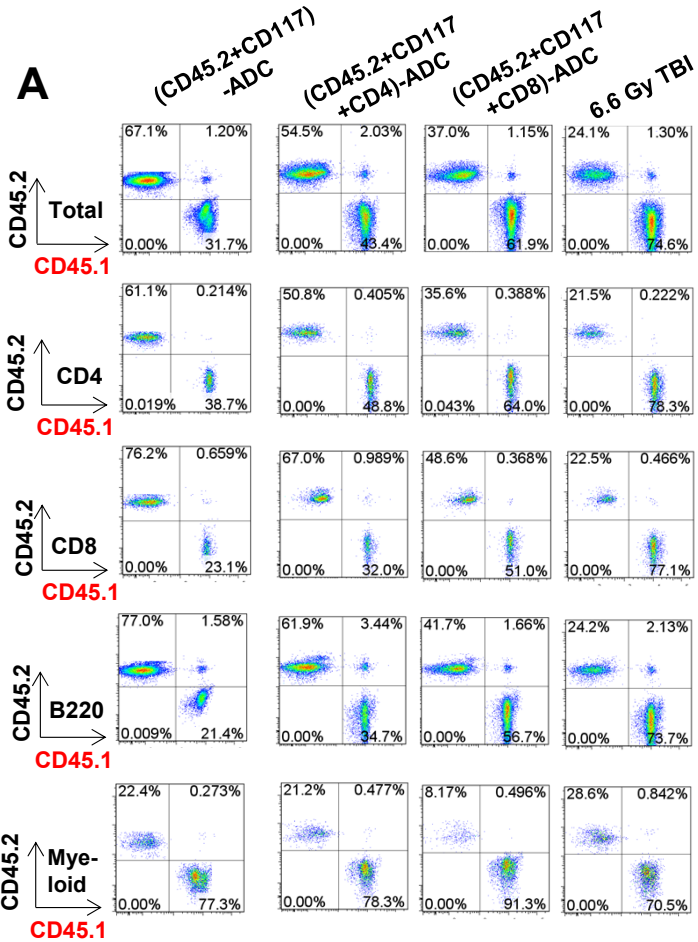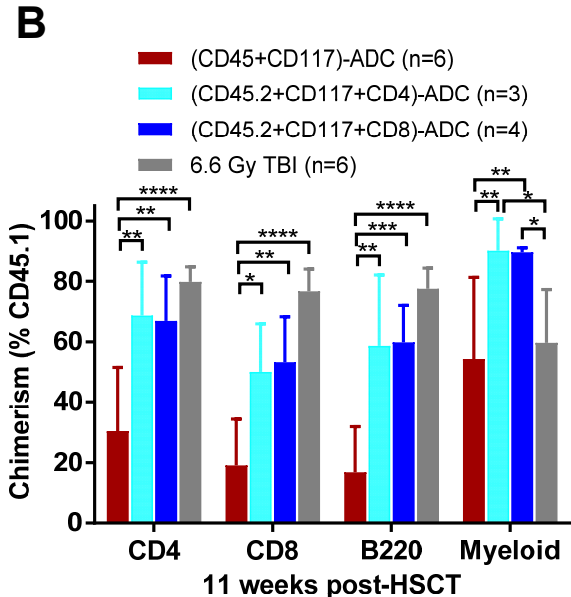

Supplement: baADV2019000516-suppl1.pdf [file baADV2019000516-suppl1.pdf]
